# Supplementary material for: Clinical, Laboratory and Radiological features, and Outcome of Acute Fat Embolism Syndrome in Sickle Cell Disease
Source: Research Square preprint supplement (doi:10.21203/rs.3.rs-5040224/v1), 2025-07-15
Supplement: Supplementary file 1 [file 6cb2af305ab6847fb5c2e7b7.docx]

**Table 1 chest radiograph and CT scan findings in patients with pulmonary fat embolism (supplemental)**

| Findings |  | Chest X-ray (n=25) | CT scan (n=14) | Comments |
| --- | --- | --- | --- | --- |
| Ground glass opacities |  |  | 12 |  |
| Increased reticulation/ Interstitial Thickening |  | 14 | 8 |  |
| Consolidation atelectasis |  | 22 | 13 |  |
|  | Bilateral lower lobe | 14 |  |  |
|  | Left lower lobe | 2 |  |  |
|  | Right lower lobe | 1 |  |  |
|  | Central non-dependent | 3 |  |  |
|  | Bilateral peripheral | 2 |  |  |
| Nodules |  |  | 7 | including random, tree in bud, centrilobular, and sub-pleural |
| Pleural effusion |  | 10 | 4 |  |
| Pulmonary artery filling defect |  |  | 2 |  |
| Cardiomegaly/ right ventricular strain |  | 6 | 1 | Volume overload |
